# Supplementary material for: Measurement of Redox Biomarkers in the Whole Blood and Red Blood Cell Lysates of Dogs
Source: MDPI journal article supplement (doi:10.3390/antiox11020424), 2022-02-19
Supplement: s1 [file s1]

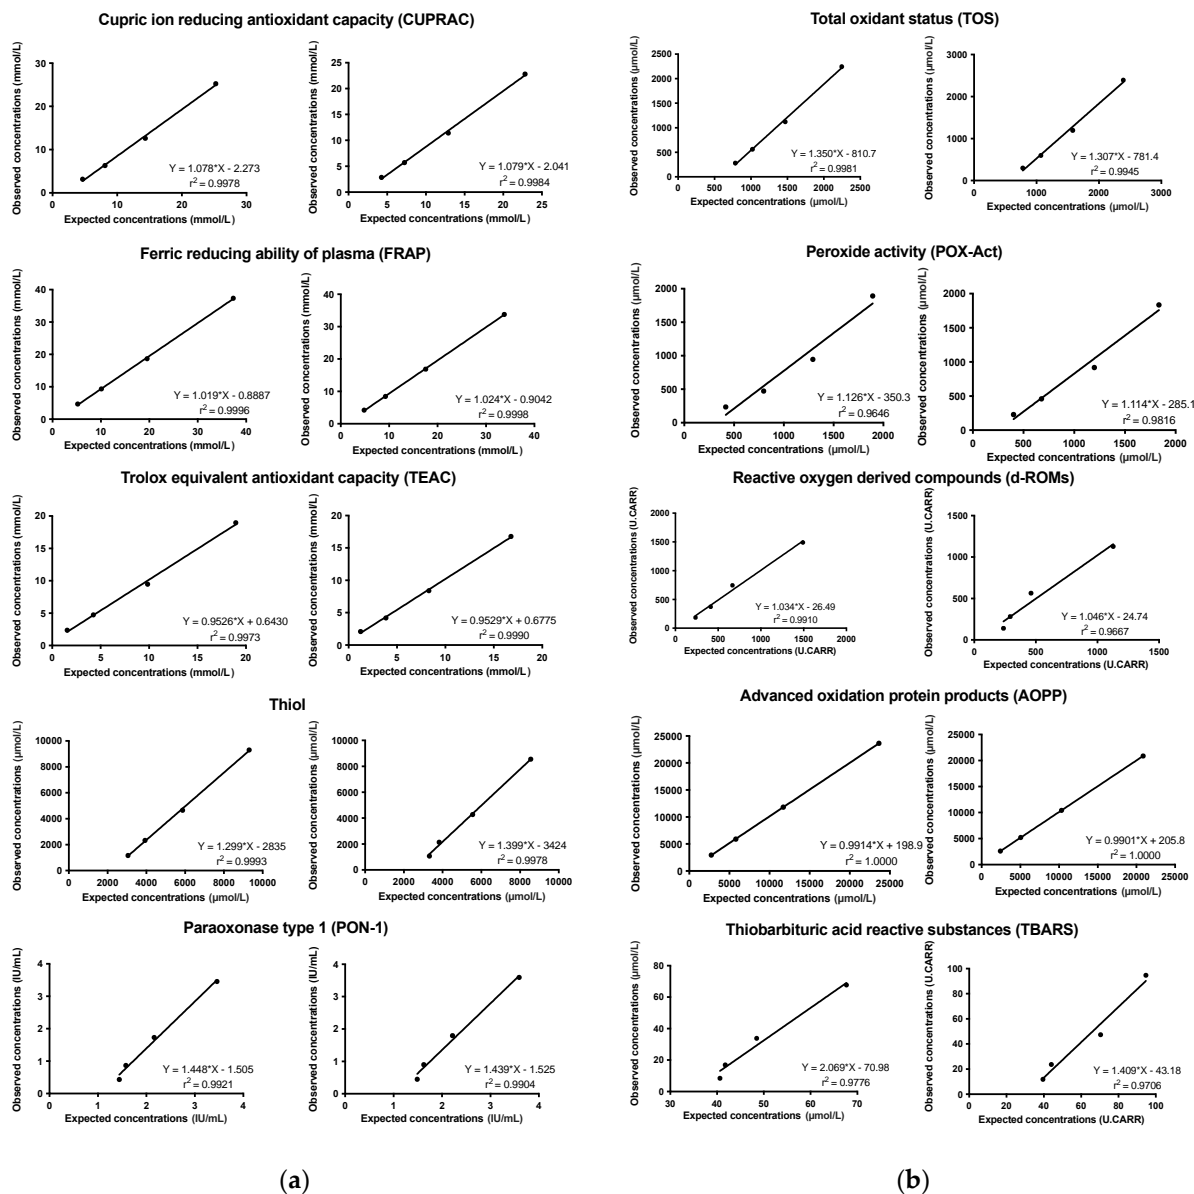

**Figure S1.** Linear regression of the antioxidant (a) and oxidant (b) biomarkers validated in whole blood (WB). Regression line showing two WB samples at various dilutions. Regression equation and coefficient of determination ( $r^2$ ) are shown.

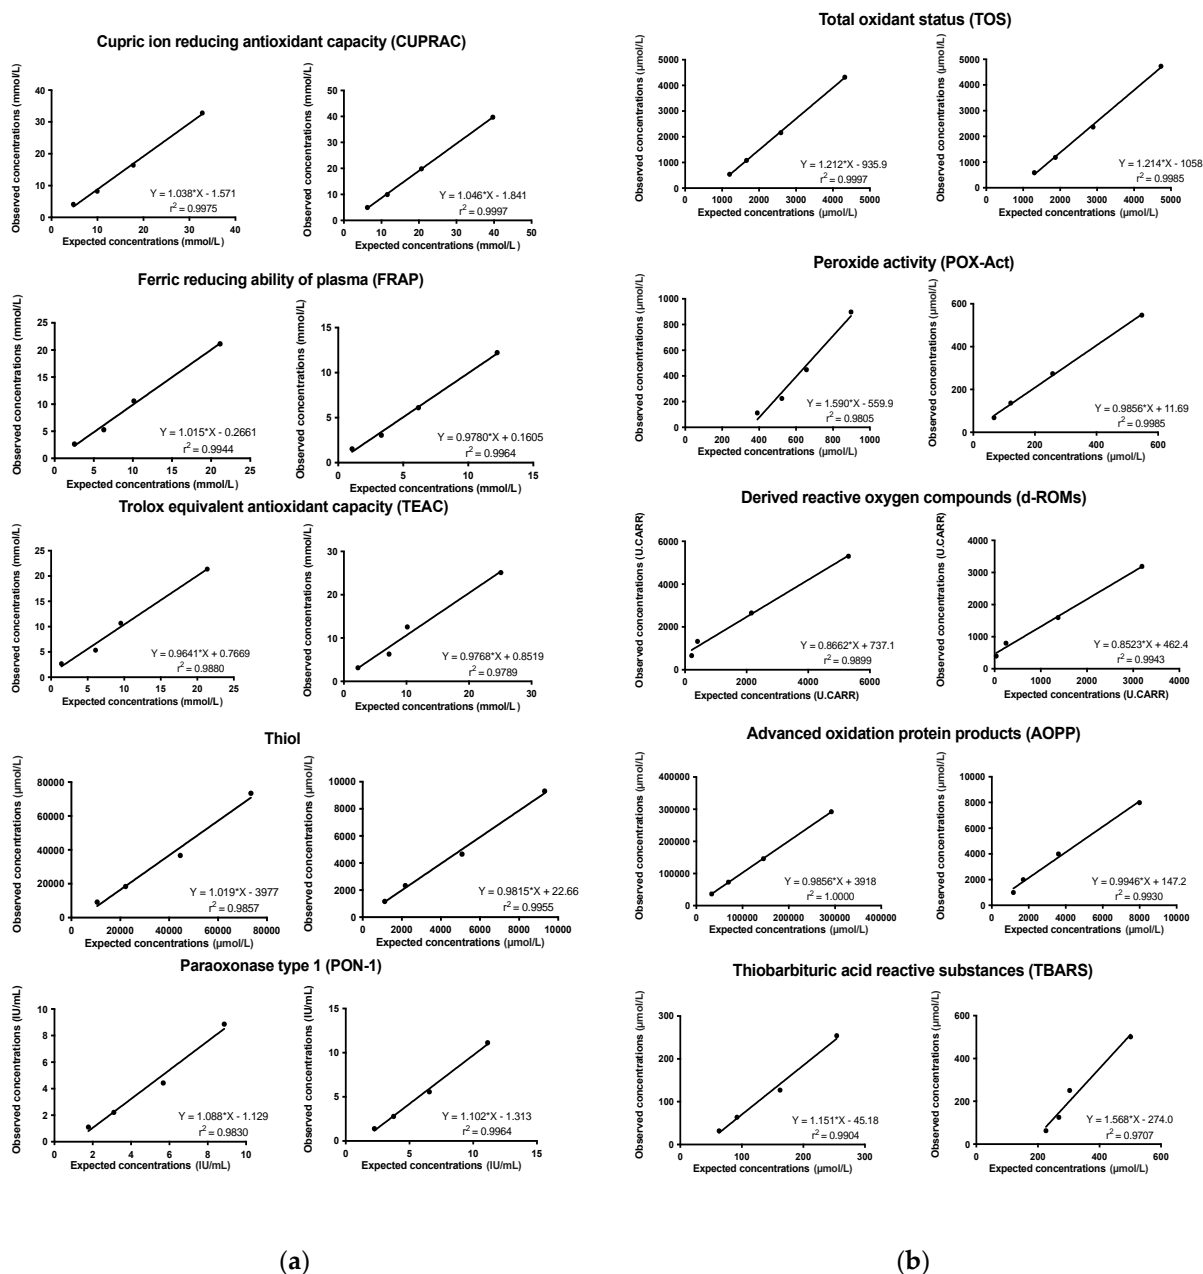

**Figure S2.** Linear regression of the antioxidant (a) and oxidant (b) biomarkers validated in red blood cells (RBCs) lysates. Regression line showing two WB samples at various dilutions. Re-regression equation and coefficient of determination ( $r^2$ ) are shown.

**Table S1.** Mean, standard deviation (SD) and intra- and inter-assay coefficients of variation (CVs, given in %) for antioxidant and oxidant biomarkers obtained in the precision study of assays for validation in two whole blood (WB) samples from dogs (A = Low concentrations, B = High concentrations).

|                           |   | Intra-assay |        |        | Inter-assay |         |        |
|---------------------------|---|-------------|--------|--------|-------------|---------|--------|
|                           |   | Mean        | SD     | CV (%) | Mean        | SD      | CV (%) |
| CUPRAC<br>(mmol/L)        | A | 25.81       | 0.198  | 0.77   | 25.53       | 0.360   | 0.014  |
|                           | B | 36.48       | 0.221  | 0.61   | 36.55       | 0.212   | 0.06   |
| FRAP<br>(mmol/L)          | A | 20.40       | 0.260  | 1.27   | 20.74       | 0.593   | 2.86   |
|                           | B | 44.31       | 0.108  | 0.24   | 45.25       | 0.656   | 1.45   |
| TEAC<br>(mmol/L)          | A | 11.48       | 0.250  | 2.14   | 12.54       | 0.829   | 6.61   |
|                           | B | 22.28       | 0.242  | 1.08   | 23.49       | 1.425   | 6.06   |
| Thiol<br>( $\mu$ mol/L)   | A | 9282        | 234    | 0.025  | 9546        | 299.612 | 0.031  |
|                           | B | 12668       | 156    | 0.01   | 13226       | 304     | 0.02   |
| PON-1<br>(IU/mL)          | A | 4.66        | 0.117  | 1.88   | 3.15        | 0.181   | 2.86   |
|                           | B | 6.21        | 0.056  | 1.21   | 5.40        | 0.154   | 5.76   |
| TOS<br>( $\mu$ mol/L)     | A | 2878        | 40     | 1.40   | 2841        | 30      | 1.07   |
|                           | B | 3908        | 201    | 5.16   | 3995        | 50      | 1.25   |
| POX-Act<br>( $\mu$ mol/L) | A | 527         | 31     | 6.04   | 525         | 48      | 9.21   |
|                           | B | 789         | 74     | 9.47   | 796         | 55      | 6.98   |
| d-ROMs<br>(U.CARR)        | A | 226         | 5.851  | 2.58   | 225         | 10.889  | 4.82   |
|                           | B | 411         | 13.181 | 3.21   | 420         | 12.767  | 3.04   |
| AOPP<br>( $\mu$ mol/L)    | A | 24759       | 92     | 0.37   | 25774       | 622     | 2.41   |
|                           | B | 36152       | 110    | 0.31   | 37313       | 882     | 2.36   |
| TBARS<br>( $\mu$ mol/L)   | A | 46.33       | 7      | 15.89  | 39.74       | 5.414   | 13.62  |
|                           | B | 64.76       | 9      | 15.41  | 67.01       | 4.946   | 7.38   |

**Table S2.** Mean, standard de-viation (SD) and intra- and inter-assay coefficients of variation (CVs, given in %) for antioxidant and oxidant biomarkers obtained in the precision study of assays for validation in two red blood cells (RBCs) lysate samples from dogs (A = Low concentrations, B = High concentrations).

|                           |   | Intra-assay |       |        | Inter-assay |       |        |
|---------------------------|---|-------------|-------|--------|-------------|-------|--------|
|                           |   | Mean        | SD    | CV (%) | Mean        | SD    | CV (%) |
| CUPRAC<br>(mmol/L)        | A | 28.28       | 0.64  | 2.27   | 27.55       | 0.245 | 0.89   |
|                           | B | 35.31       | 0.91  | 2.60   | 35.35       | 0.204 | 0.57   |
| FRAP<br>(mmol/L)          | A | 34.91       | 0.656 | 1.88   | 34.14       | 0.653 | 1.91   |
|                           | B | 47.05       | 0.503 | 1.07   | 46.80       | 1.267 | 2.71   |
| TEAC<br>(mmol/L)          | A | 17.72       | 0.279 | 1.57   | 18.74       | 1.713 | 9.14   |
|                           | B | 23.15       | 0.436 | 1.88   | 22.55       | 0.850 | 3.768  |
| Thiol<br>( $\mu$ mol/L)   | A | 7824        | 281   | 3.59   | 9034        | 675   | 7.48   |
|                           | B | 10036       | 234   | 2.34   | 10414       | 406   | 4.64   |
| PON-1<br>(IU/mL)          | A | 0.54        | 0.025 | 2.24   | 0.72        | 0.120 | 8.09   |
|                           | B | 1.12        | 0.022 | 3.96   | 1.33        | 0.058 | 8.96   |
| TOS<br>( $\mu$ mol/L)     | A | 2998        | 34    | 1.17   | 2962        | 24    | 0.84   |
|                           | B | 4008        | 93    | 2.33   | 4044        | 52    | 1.30   |
| POX-Act<br>( $\mu$ mol/L) | A | 175         | 11    | 6.66   | 165         | 15    | 9.58   |
|                           | B | 521         | 3     | 0.74   | 498         | 24    | 4.97   |
| d-ROMs<br>(U.CARR)        | A | 370         | 154   | 4.53   | 377         | 26    | 15.98  |
|                           | B | 1431        | 17    | 10.79  | 1630        | 260   | 7.13   |
| AOPP<br>( $\mu$ mol/L)    | A | 24522       | 250   | 1.02   | 21684       | 533   | 2.46   |
|                           | B | 33218       | 351   | 1.06   | 30020       | 853   | 2.84   |
| TBARS<br>( $\mu$ mol/L)   | A | 127         | 5     | 4.07   | 125         | 11    | 9.41   |
|                           | B | 211         | 21    | 9.84   | 176         | 22    | 12.60  |
